# Supplementary material for: Implementing a sulfur-substitution approach toward a high-performance recyclable polythioester
Source: Royal Society of Chemistry journal article supplement (doi:10.1039/d4py01425a), 2025-01-01
Supplement: d4py01425a1.pdf [file d4py01425a1.pdf]

Supporting Information for

## Implementing Sulfur-Substitution Approach Toward a High- Performance Recyclable Polythioester

Si-Qi Wang,<sup>a</sup> Long-Hai Liu,<sup>a</sup> Kun Li,<sup>a</sup> Wei Xiong,<sup>a</sup> Hua-Zhong Fan,<sup>a</sup> Qing Cao,<sup>a</sup> Zhongzheng Cai,<sup>a\*</sup>  
and Jian-Bo Zhu<sup>a\*</sup>

<sup>a</sup>National Engineering Laboratory of Eco-Friendly Polymeric Materials (Sichuan),  
College of Chemistry, Sichuan University, Chengdu, 610064, P. R. China

### **TABLE OF CONTENTS**

|                                                                                                                                                                                       |           |
|---------------------------------------------------------------------------------------------------------------------------------------------------------------------------------------|-----------|
| <b>Supporting Information for</b> .....                                                                                                                                               | <b>1</b>  |
| <b>Materials and Methods</b> .....                                                                                                                                                    | <b>3</b>  |
| <b>Monomer Preparations</b> .....                                                                                                                                                     | <b>4</b>  |
| <b>Scheme S1.</b> Synthesis of tCL.....                                                                                                                                               | 4         |
| <b>Fig. S1</b> <sup>1</sup> H NMR (CDCl <sub>3</sub> , 25 °C) spectrum of tnCL. ....                                                                                                  | 5         |
| <b>Fig. S2</b> <sup>1</sup> H NMR (CDCl <sub>3</sub> , 25 °C) spectrum of tCL.....                                                                                                    | 5         |
| <b>General Polymerization Procedures</b> .....                                                                                                                                        | <b>6</b>  |
| <b>Table S1</b> Results of ROP of tCL. <sup>[a]</sup> .....                                                                                                                           | 6         |
| <b>Polymer Characterization</b> .....                                                                                                                                                 | <b>7</b>  |
| <b>Fig. S3</b> Chain transesterification in this polymerization systems. ....                                                                                                         | 7         |
| NMR spectra of polymer.....                                                                                                                                                           | 7         |
| <b>Fig. S4</b> <sup>1</sup> H NMR (CDCl <sub>3</sub> , 25 °C) spectrum of P(tCL) obtained by [tCL]/[La] = 50/1. 8                                                                     |           |
| <b>Fig. S5</b> <sup>1</sup> H NMR (CDCl <sub>3</sub> , 25 °C) spectrum of P(tCL) obtained by [tCL]/[TBD]/<br>[BnSH] = 50/1/1.....                                                     | 8         |
| <b>Fig. S6</b> TGA and DTG curves for P(tCL) obtained by [tCL]/[TBD]/[I] = 100/1/1, T <sub>d</sub> =<br>330 °C, T <sub>max</sub> = 397 °C.....                                        | 9         |
| <b>Fig. S7</b> TGA and DTG curves for P(tCL) obtained by [tCL]/[La] = 1000/1, T <sub>d</sub> =<br>309 °C, T <sub>max</sub> = 363 °C.....                                              | 10        |
| <b>Fig. S8</b> DSC curves for P(tCL) obtained by [tCL]/[TBD]/[I] = 100/1/1, T <sub>c</sub> = 82 °C, T <sub>m</sub><br>= 101 °C. ....                                                  | 10        |
| <b>MALDI-TOF MS Spectrum of The Low-Molecular-Weight P(tCL)</b> .....                                                                                                                 | <b>11</b> |
| <b>Fig. S9</b> MALDI-TOF MS spectrum of the low-molecular-weight P(tCL) produced<br>by [tCL]/[TBD]/[BnSH] = 50/1/1. ....                                                              | 11        |
| <b>Fig. S10</b> linear plot of m/z values (y) vs the number of tCL repeat units (x).....                                                                                              | 11        |
| <b>Fig. S11</b> cyclic plot of m/z values (y) vs the number of tCL repeat units (x). ....                                                                                             | 12        |
| <b>Fig. S12</b> SEC trace of P(tCL) obtained by [tCL]/[TBD]/[I] = 100/1/1, M <sub>n</sub> = 13.9 kDa,<br>Đ = 1.33 (Table S1, entry 1). ....                                           | 12        |
| <b>Fig. S13</b> SEC trace of P(tCL) obtained by [tCL]/La[N(SiMe <sub>3</sub> ) <sub>2</sub> ] <sub>3</sub> = 1000/1, M <sub>n</sub> = 103<br>kDa, Đ = 1.67 (Table S1, entry 10). .... | 13        |

|                                                                                                                      |           |
|----------------------------------------------------------------------------------------------------------------------|-----------|
| <b>Fig. S14</b> Powder XRD profiles of P(tCL).....                                                                   | 13        |
| <b>Mechanical Property</b> .....                                                                                     | <b>14</b> |
| <b>Fig. S15</b> Polymer samples for mechanical test. ....                                                            | 14        |
| <b>Table S2</b> Melt pressing temperature and $M_n$ and $\bar{D}$ before and after melt<br>pressing. ....            | 14        |
| <b>Fig. S16</b> Stress-strain curves of P(tCL)s.....                                                                 | 15        |
| <b>Table S3</b> Summary of mechanical properties of P(tCL)s. <sup>[a]</sup> .....                                    | 15        |
| <b>Fig. S17</b> Stress-strain curves of Low- $M_n$ P(tCL) samples.....                                               | 16        |
| <b>Table S4</b> Summary of mechanical properties of Low- $M_n$ P(tCL). <sup>[a]</sup> .....                          | 16        |
| <b>Fig. S18</b> Stress-strain curves of LDPE.....                                                                    | 17        |
| <b>Table S5</b> Summary of mechanical properties of LDPE. <sup>[a]</sup> .....                                       | 17        |
| <b>Transport Property</b> .....                                                                                      | <b>18</b> |
| <b>Table S6</b> Oxygen permeability values of LDPE and P(tCL). ....                                                  | 18        |
| <b>Table S7</b> Water vapor transmission rate of LDPE and P(tCL). ....                                               | 18        |
| <b>The Hydrolytic Stability Study</b> .....                                                                          | <b>19</b> |
| <b>Fig. S19</b> The polymer weight change curves of P(tCL).....                                                      | 19        |
| <b>Fig. S20</b> The molecular weight and dispersity change curves of P(tCL).....                                     | 19        |
| <b>Thermodynamic Study</b> .....                                                                                     | <b>20</b> |
| <b>Table S8</b> Raw data over equilibrium conversion at various temperatures for tCL.<br>.....                       | 20        |
| <b>Fig. S21</b> Van't Hoff plot of $\ln[tCL]_{eq}$ vs. reciprocal of the absolute temperature ( $T^{-1}$ ).<br>..... | 21        |
| <b>Chemical Recycling to Monomer (CRM)</b> .....                                                                     | <b>22</b> |
| General procedures for the CRM of polymers under thermal bulk condition....                                          | 22        |
| <b>Fig. S22</b> Thermal depolymerization of polymer to monomer via vacuum<br>distillation.....                       | 22        |
| <b>Table S9</b> Results of bulk thermal depolymerization of P(tCL). <sup>[a]</sup> .....                             | 22        |
| <b>Fig. S23</b> $^1H$ NMR spectra of the recycled tCL by the thermal depolymerization of<br>P(tCL). ....             | 23        |
| <b>Table S10</b> Results of repolymerization of recycled tCL.....                                                    | 23        |
| <b>General procedure for the CRM of P(tCL) from a mixture of commodity plastics. ...</b>                             | <b>24</b> |
| <b>Table S11</b> Composition of polymer mixture used in depolymerization study from<br>mixed feedstocks.....         | 24        |
| <b>Fig. S24</b> $^1H$ NMR ( $CDCl_3$ , 25 °C) spectrum of recycled tCL after depolymerization.<br>.....              | 25        |
| <b>Table S12</b> Results of repolymerization recycled tCL.....                                                       | 25        |
| <b>Reference</b> .....                                                                                               | <b>25</b> |

## Materials and Methods

**Matrix-assisted laser desorption/ionization time-of-flight mass spectroscopy (MALDI-TOF MS).** An AXIMA Performance instrument was used in reflection mode with anthralin as the matrix. A thin layer of a 1% NaI solution was first deposited on the target plate, followed by the solutions of matrix (0.4  $\mu$ L, 5 mg/mL in tetrahydrofuran) and polymer (2  $\mu$ L, 5 mg/mL in tetrahydrofuran) were mixed together. The mixed solution was spotted on the MALDI sample plate and air-dried. The raw data was processed in the Shimadzu Biotech MALDI-MS software.

### **Wide angle X-ray diffraction (WXR)**

Powder X-ray diffraction data were obtained using a Bruker D2 Phaser diffractometer with Cu-K $\alpha$  radiation ( $\lambda = 1.5416 \text{ \AA}$ ) at 30 kV and 10 mA (scan of  $2\theta = 1.5\text{--}60^\circ$  with a speed of  $1^\circ/\text{min}$ ).

### **WVTR and oxygen permeability**

Individual sample thickness ( $\sim 0.30 \text{ mm}$ ) was measured before testing using film thickness gauge TG-3130-A3. The WVTR was measured by a Labthink W3/062 equipment at  $38^\circ\text{C}$  and 90% relative humidity. Oxygen permeability was measured by a Labthink Pressure Change Apparatus equipment G2/132 at  $23^\circ\text{C}$ .

### **Mechanical Analysis**

Tensile stress/strain testing was performed by an Instron 5967 universal testing system. Samples were made by melt press in a steel mold ( $50 \times 4 \times 0.4 \text{ mm}^3$ ) and were stretched at a strain rate of  $10 \text{ mm/min}$  at ambient temperature until break. The measurements were performed 4 times for each test, and the values reported are averaged from the measured data.

## Monomer Preparations

### Scheme S1. Synthesis of tCL

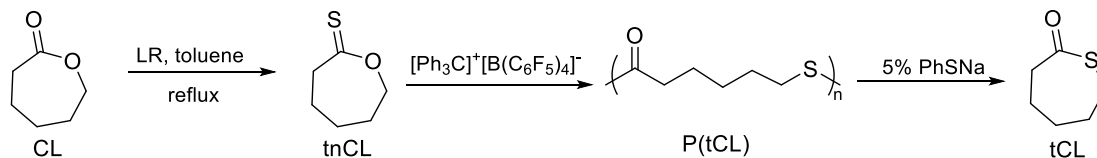

**Step One:** A mixture of caprolactone (20.6 g, 20 mL, 181 mmol) and Lawesson's reagent (43.8 g, 108 mmol) in toluene (400 mL) was stirred at reflux for 1 h. After 1 h, the full consumption of starting material was confirmed by TLC analysis. Upon cooling to room temperature (RT), the insoluble substance was filtered to remove. Then the removal of the solvent under reduced pressure, the crude product was purified by flash column chromatography (petroleum ether/ethyl acetate = 30/1), which afforded 2-oxepanethione as a yellow oil (13 g, yield = 55 %).<sup>[1]</sup> The obtained 2-oxepanethione (tnCL) was purified via vacuum distillation after drying over  $\text{CaH}_2$  for 1 day, which was then stored at  $-35\text{ }^\circ\text{C}$  inside the glovebox.  $^1\text{H}$  NMR (400 MHz,  $\text{CDCl}_3$ )  $\delta$  4.60–4.36 (m, 2H), 3.25–3.08 (m, 2H), 1.86 (t,  $J = 7.3, 5.0, 2.1$  Hz, 2H), 1.81–1.66 (m, 4H).

**Step Two:** In this typical polymerization reaction, the solution of initiator  $[\text{Ph}_3\text{C}]^+[\text{B}(\text{C}_6\text{F}_5)_4]^-$  (92.1 mg) in 2 mL toluene was added to the vigorously stirred prepared monomer (13 g) in 45.2 mL toluene. The polymerization reactions were performed in 250 mL glass bottle inside the glovebox at ambient temperature and  $[\text{tnCL}]/[\text{I}]=1000:1$ . After 1 h, the polymerization was quenched by addition of 10 mL  $\text{CDCl}_3$  acidified with benzoic acid (2 wt%). The quenched mixture precipitated into 500 mL of cold methanol, filtered, and washed with cold methanol. This procedure was repeated twice to ensure any catalyst residue or unreacted monomer was removed. The polymer was dried in a vacuum oven at  $60\text{ }^\circ\text{C}$  to a constant weight.  $^1\text{H}$  NMR (400 MHz,  $\text{CDCl}_3$ )  $\delta$  2.85 (t,  $J = 7.3$  Hz, 2H), 2.53 (t,  $J = 7.5$  Hz, 2H), 1.73–1.51 (m, 6H), 1.45–1.33 (m, 2H).

**Step Three:** PEO-10000 and polymer (12.8 g) were mixed in a weight ratio of 2:1, and PhSNa (681 mg) was added. The mixture was subjected to vacuum distillation at  $180\text{ }^\circ\text{C}$ . After the reaction was stopped, the distillate was collected as the pure tCL (12 g, yield = 94%).  $^1\text{H}$  NMR (400 MHz,  $\text{CDCl}_3$ )  $\delta$  3.08–2.99 (m, 2H), 2.91–2.82 (m, 2H), 2.12 (p,  $J = 5.9$  Hz, 2H), 1.90–1.73 (m, 4H).

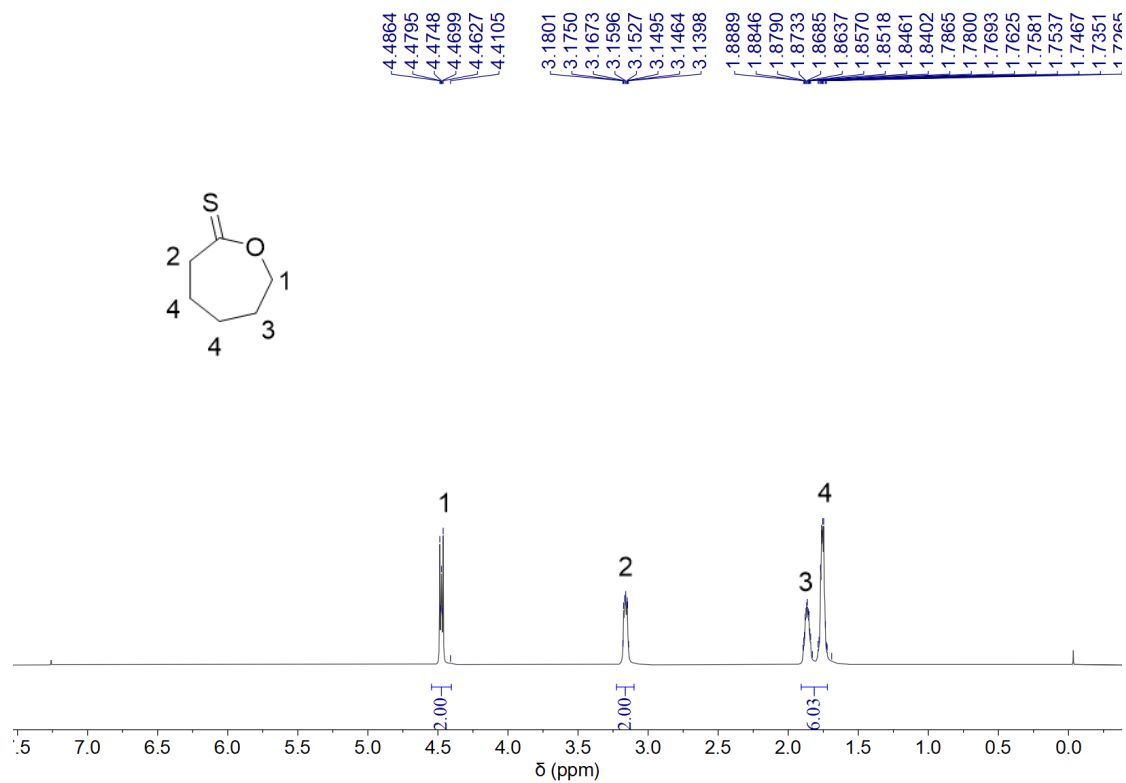

Fig. S1  $^1\text{H}$  NMR ( $\text{CDCl}_3$ , 25 °C) spectrum of tnCL.

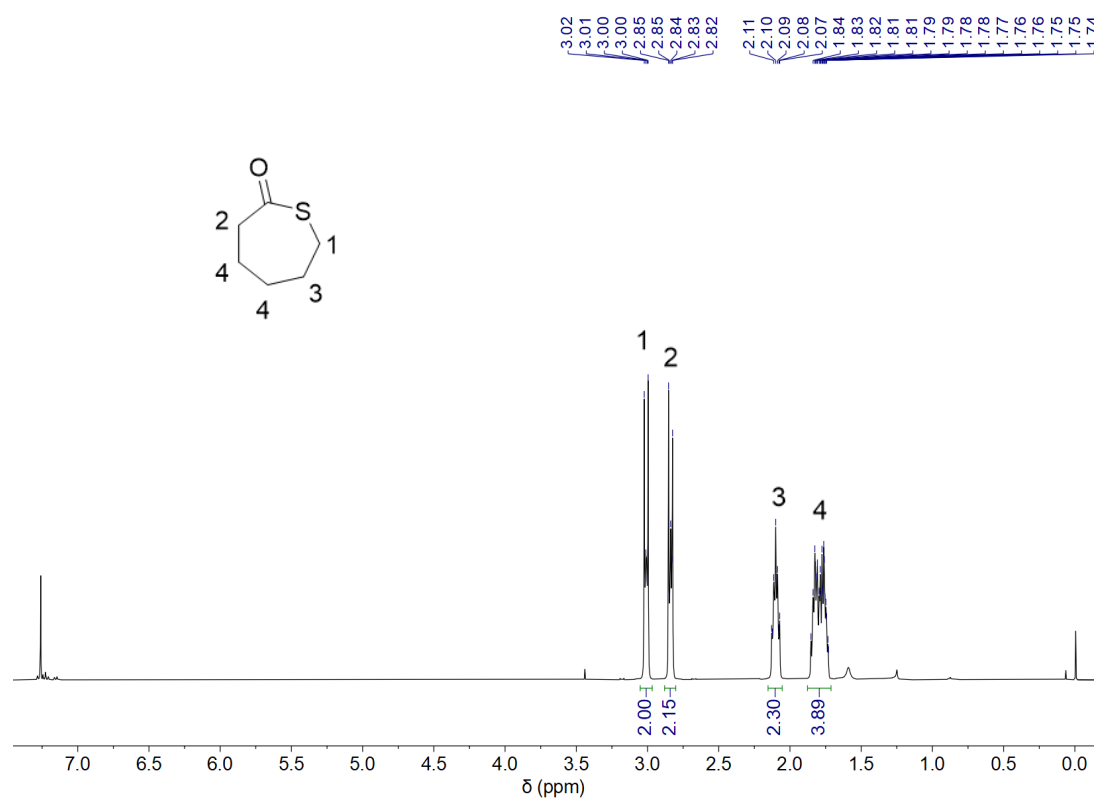

Fig. S2  $^1\text{H}$  NMR ( $\text{CDCl}_3$ , 25 °C) spectrum of tCL.

## General Polymerization Procedures

Polymerization reactions were performed in 4 mL glass vials inside the glovebox for ambient temperature runs. In a typical polymerization reaction, the solution of catalyst in DCM or toluene was added to the vigorously stirred prepared monomer and initiator (benzyl mercaptan) solution in DCM or toluene. After a desired period of time, the polymerization was quenched by addition of 1 mL CDCl<sub>3</sub> with benzoic acid (1 wt.%). The quenched mixture precipitated into 50 mL of cold methanol, filtered, and washed with cold methanol. This procedure was repeated twice to ensure any catalyst residue or unreacted monomer was removed. The polymer was dried in a vacuum oven at 60 °C to a constant weight.

**Table S1** Results of ROP of tCL. <sup>[a]</sup>

| Entry          | Cat.                          | [tCL]/[Cat.]/[I] | Time (h) | Conv. <sup>[b]</sup> (%) | $M_{n,Calcd}$ <sup>[c]</sup><br>(kDa) | $M_{n,SEC}$ <sup>[d]</sup><br>(kDa) | $\mathcal{D}$ <sup>[d]</sup> |
|----------------|-------------------------------|------------------|----------|--------------------------|---------------------------------------|-------------------------------------|------------------------------|
| 1              | TBD                           | 100:1:1          | 10 min   | 88                       | 11.5                                  | 13.9                                | 1.33                         |
| 2              | TBD                           | 500:1:1          | 2        | 65                       | 42.3                                  | 42.1                                | 1.32                         |
| 3              | TBD                           | 1000:1:1         | 4        | 60                       | 78.1                                  | 43.3                                | 1.31                         |
| 4 <sup>e</sup> | TBD                           | 1500:1:1         | 5        | 74                       | 144                                   | 39.2                                | 1.33                         |
| 5 <sup>e</sup> | TBD                           | 2000:1:1         | 7        | 82                       | 214                                   | 31.3                                | 1.35                         |
| 6 <sup>f</sup> | TBD                           | 1000:1:0.33      | 20 min   | 83                       | 108                                   | 15.0                                | 1.70                         |
| 7 <sup>f</sup> | <sup>t</sup> BuP <sub>4</sub> | 1000:1:1         | 4.5      | 91                       | 118                                   | 54.8                                | 1.92                         |
| 8 <sup>f</sup> | IMes                          | 1000:1:1         | 1.3      | 47                       | 61.2                                  | 36.9                                | 1.68                         |
| 9              | <b>La</b>                     | 1000:1:3         | 2 min    | 95                       | 41.2                                  | 52.0                                | 1.90                         |
| 10             | <b>La</b>                     | 500:1:0          | 1.5 min  | 95                       | -                                     | 99.2                                | 1.94                         |
| 11             | <b>La</b>                     | 1000:1:0         | 4 min    | 94                       | -                                     | 103                                 | 1.67                         |

[a] Condition: tCL = 50 mg, Concentration = 1.1 mol/L, initiator (I) = Benzyl Mercaptan, solvent = Tol, RT. [b] Monomer conversion measured by <sup>1</sup>H NMR of the quenched solution. [c] Calculated from  $[M]_0/[BnSH]_0 \times Conv. \times MW_M + MW_{BnSH}$ . [d] Number-average molecular weight ( $M_n$ ) and dispersity index ( $\mathcal{D} = M_w/M_n$ ), determined by Size-Exclusion Chromatography (SEC) at 40 °C in THF. [e] Temp. = 60 °C. [f] Bulk polymerization, Temp. = 60 °C.

## Polymer Characterization

### Transesterification

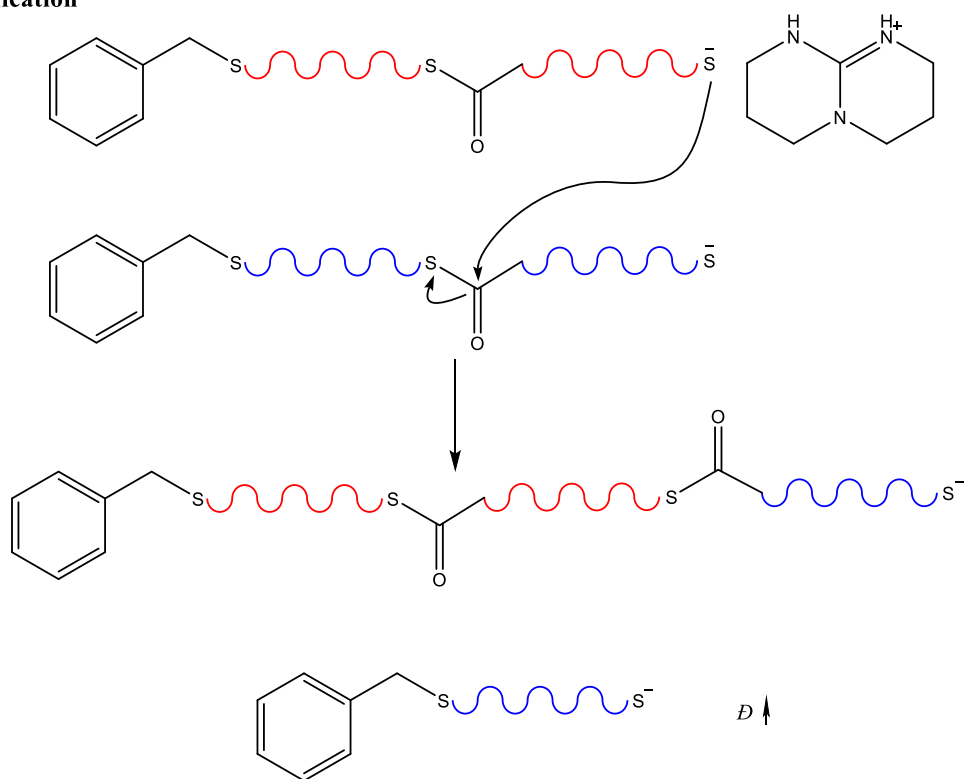

**Fig. S3** Chain transesterification in this polymerization systems.

### NMR spectra of polymer

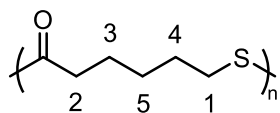

P(tCL)

$^1\text{H}$  NMR (400 MHz,  $\text{CDCl}_3$ )  $\delta$  2.85 (t,  $J = 7.3$  Hz, 2H), 2.53 (t,  $J = 7.5$  Hz, 2H), 1.73–1.51 (m, 6H), 1.45–1.33 (m, 2H).

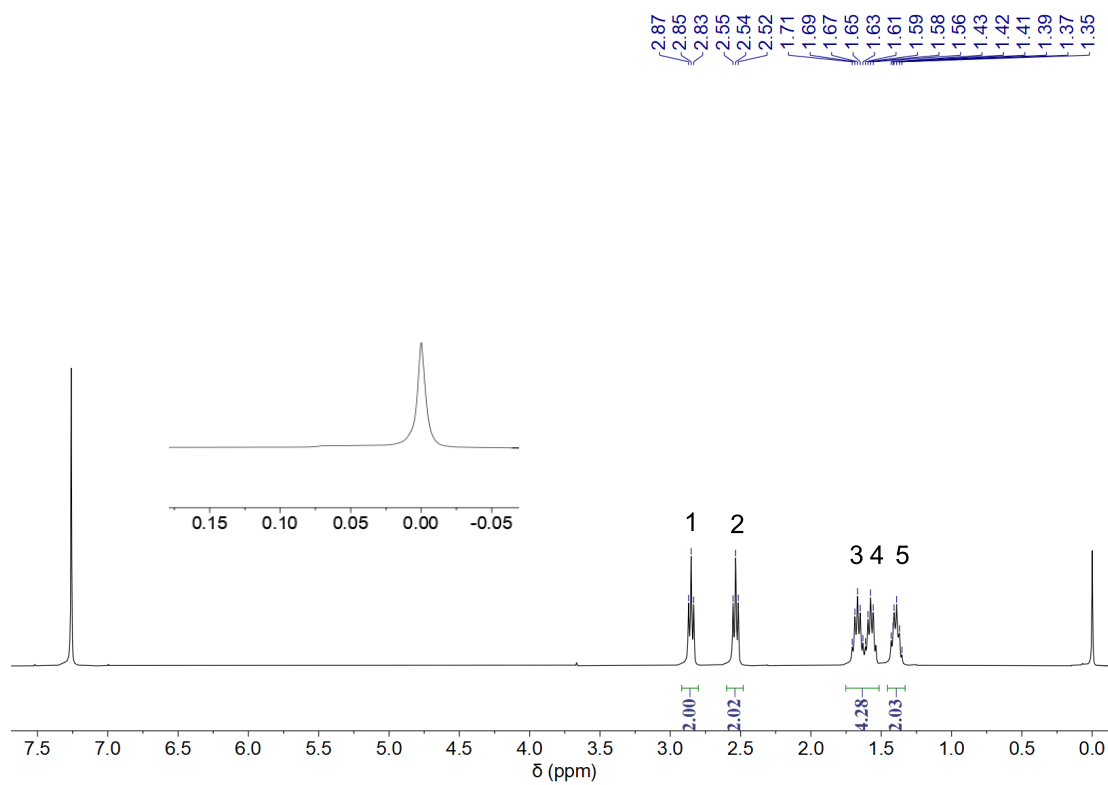

**Fig. S4**  $^1\text{H}$  NMR ( $\text{CDCl}_3$ , 25  $^\circ\text{C}$ ) spectrum of P(tCL) obtained by  $[\text{tCL}]/[\text{La}] = 50/1$ .

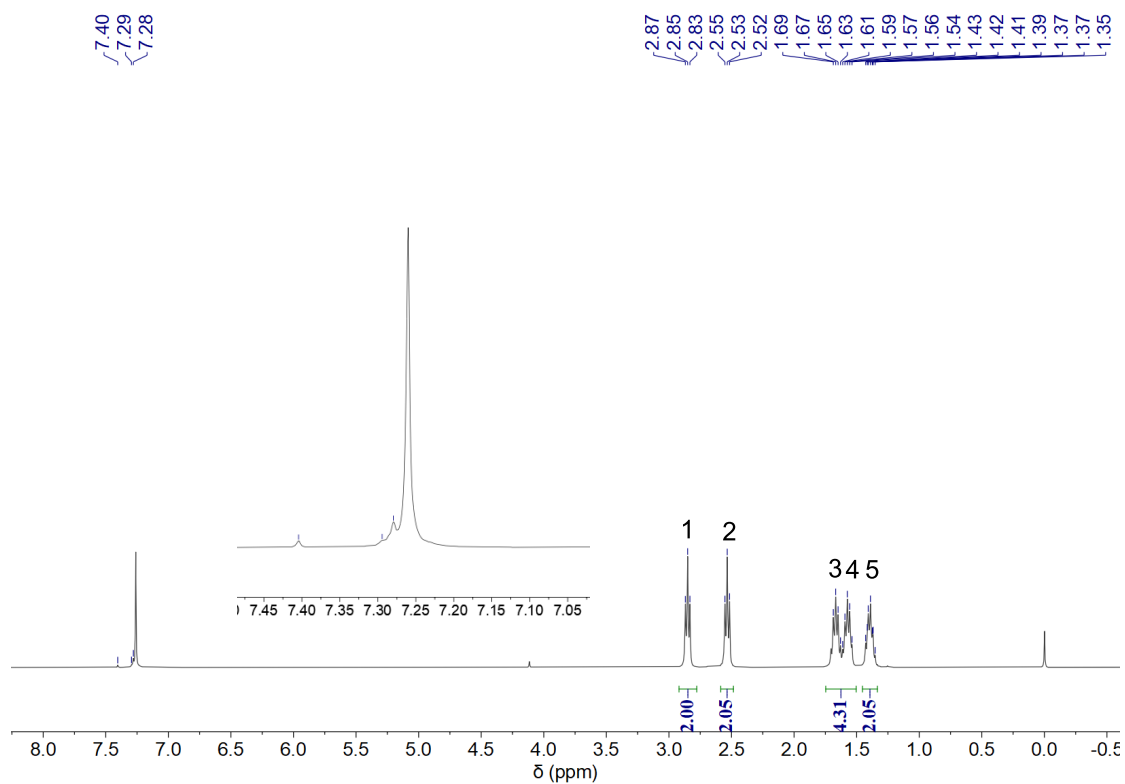

**Fig. S5**  $^1\text{H}$  NMR ( $\text{CDCl}_3$ , 25  $^\circ\text{C}$ ) spectrum of P(tCL) obtained by  $[\text{tCL}]/[\text{TBD}]/[\text{BnSH}] = 50/1/1$ .



The polymer was purified by dissolving in chloroform, and then precipitated into cold methanol, filtered, and washed with cold methanol. This procedure was repeated twice to ensure any catalyst residue or unreacted monomer was removed. The polymer was dried in a vacuum oven at 60 °C to a constant weight.

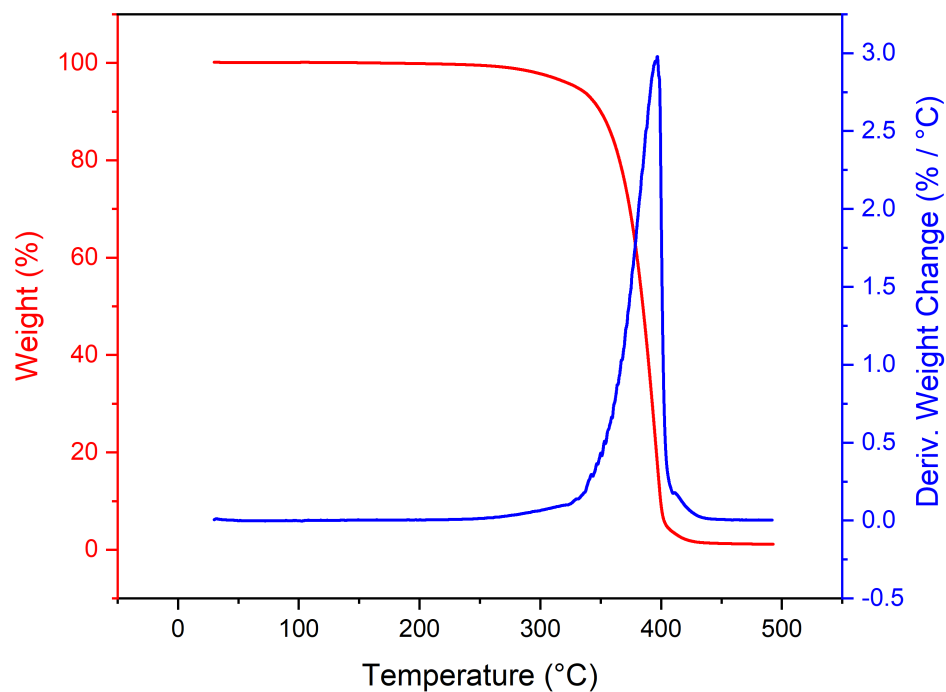

**Fig. S6** TGA and DTG curves for P(tCL) obtained by [tCL]/[TBD]/[I] = 100/1/1,  $T_d = 330$  °C,  $T_{max} = 397$  °C.

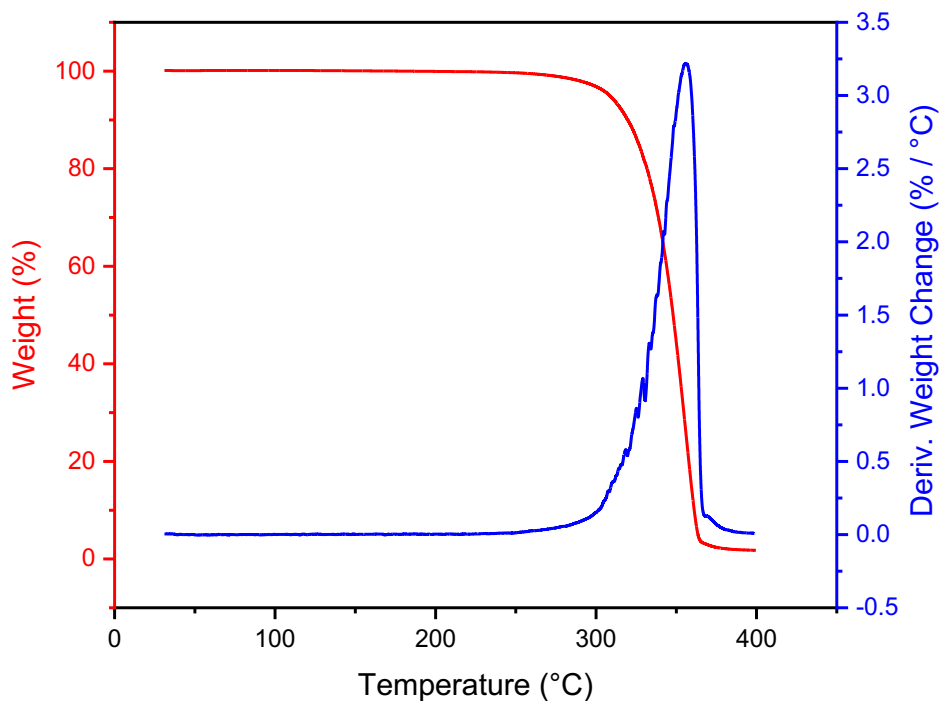

**Fig. S7** TGA and DTG curves for P(tCL) obtained by [tCL]/[La] = 1000/1,  $T_d = 309$  °C,  $T_{max} = 363$  °C.

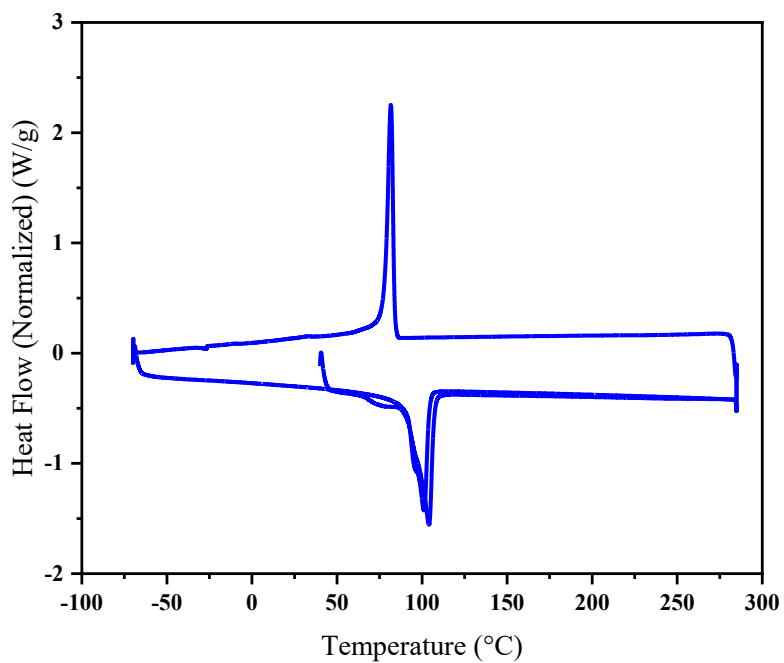

**Fig. S8** DSC curves for P(tCL) obtained by [tCL]/[TBD]/[I] = 100/1/1,  $T_c = 82$  °C,  $T_m = 101$  °C.

## MALDI-TOF MS Spectrum of The Low-Molecular-Weight P(tCL)

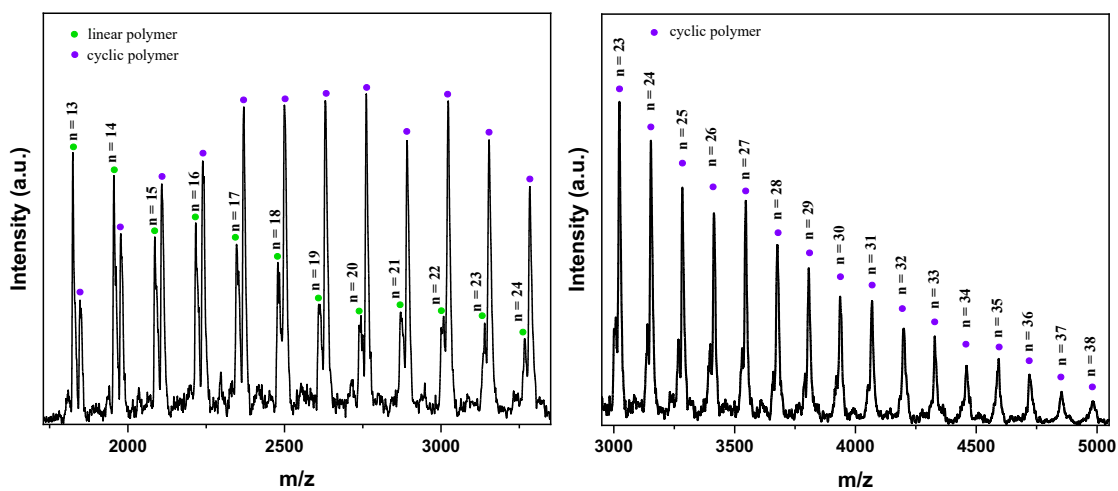

Fig. S9 MALDI-TOF MS spectrum of the low-molecular-weight P(tCL) produced by [tCL]/[TBD]/[BnSH] = 50/1/1.

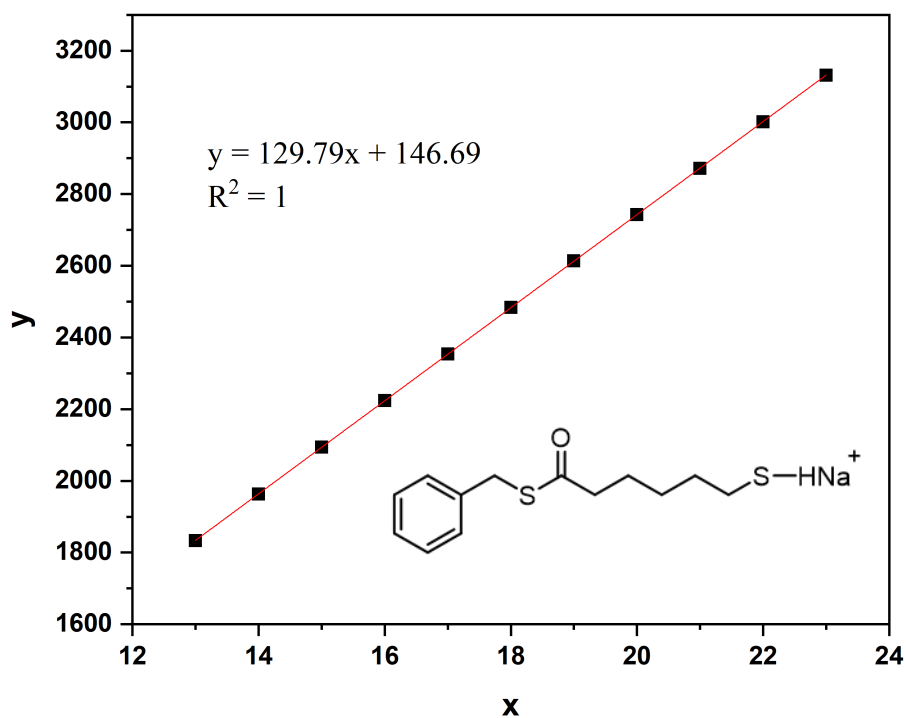

Fig. S10 linear plot of m/z values (y) vs the number of tCL repeat units (x).

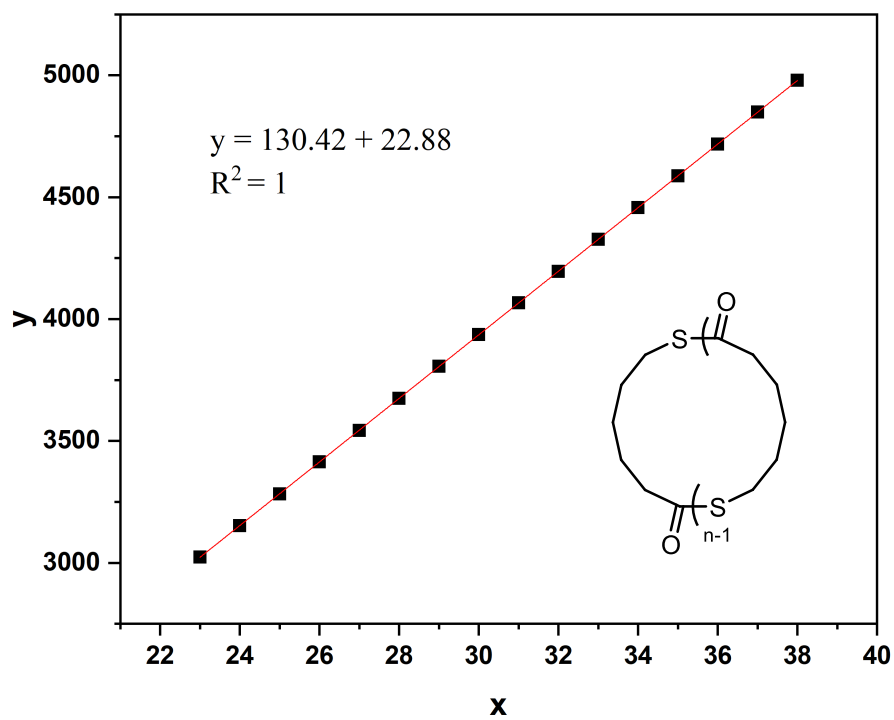

**Fig. S11** cyclic plot of m/z values (y) vs the number of tCL repeat units (x).

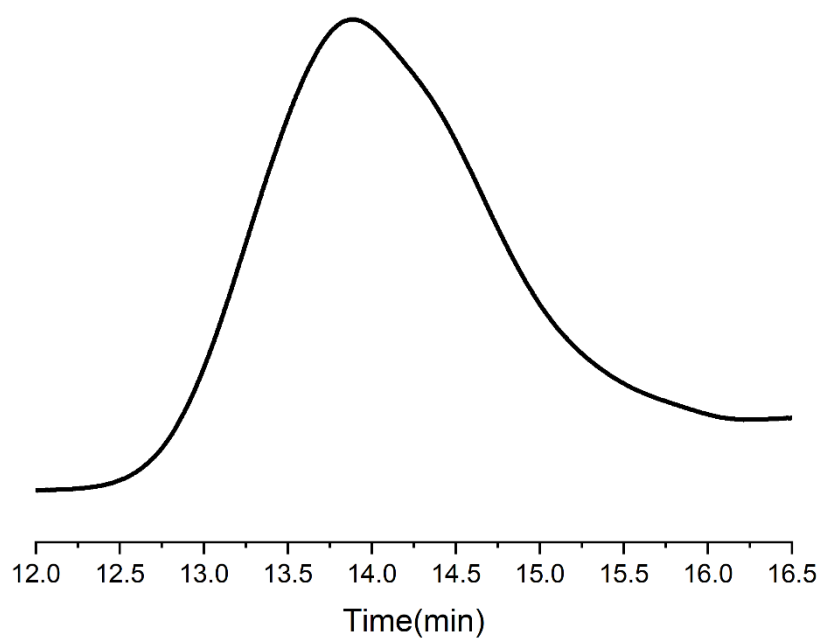

**Fig. S12** SEC trace of P(tCL) obtained by [tCL]/[TBD]/[I] = 100/1/1,  $M_n = 13.9$  kDa,  $\mathcal{D} = 1.33$  (Table S1, entry 1).

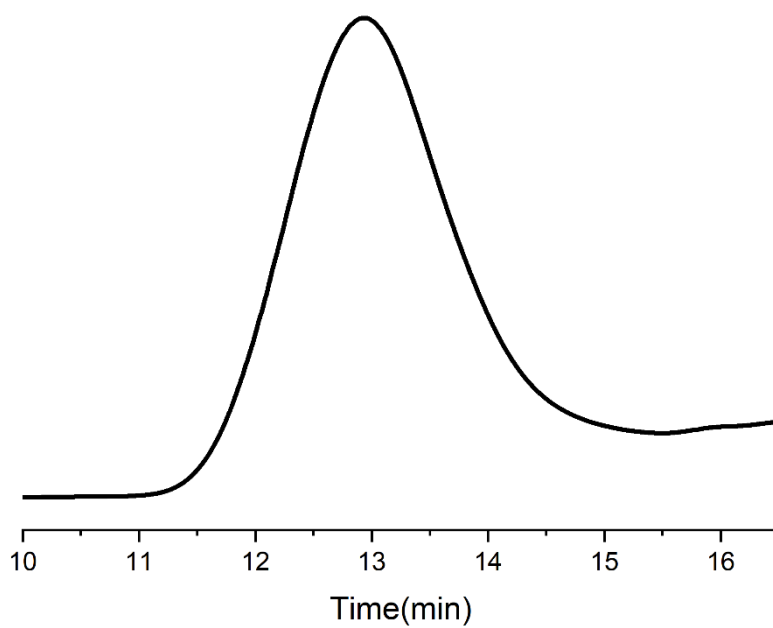

**Fig. S13** SEC trace of P(tCL) obtained by  $[\text{tCL}]/\text{La}[\text{N}(\text{SiMe}_3)_2]_3 = 1000/1$ ,  $M_n = 103$  kDa,  $\mathcal{D} = 1.67$  (Table S1, entry 10).

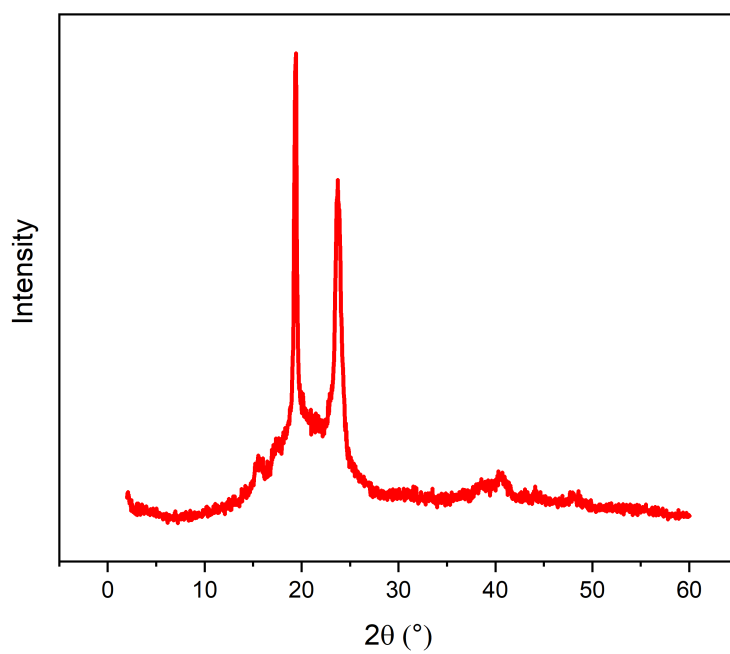

**Fig. S14** Powder XRD profiles of P(tCL).

## Mechanical Property

Low-density polyethylene (Particle size = 80 mesh; product code LDPE™ 2426K) was purchased from SINOPEC. Samples were made by melt pressing at 120 °C in a steel mold (50 × 40 × 0.4 mm<sup>3</sup>). Tensile stress/strain testing was performed by an Instron 5967 universal testing system. Samples were made by hot pressure in a steel mold (50 × 60 × 0.6 mm<sup>3</sup>) and were stretched at a strain rate of 10 mm/min at ambient temperature until break.

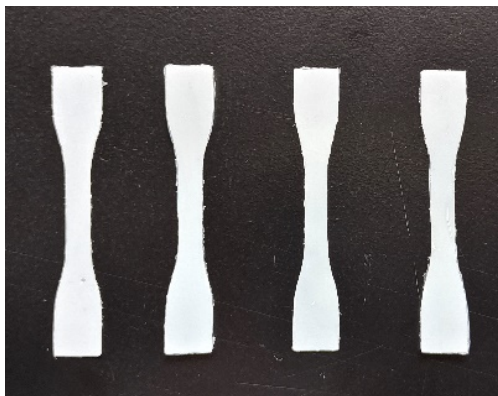

Fig. S15 Polymer samples for mechanical test.

Table S2 Melt pressing temperature and  $M_n$  and  $\bar{D}$  before and after melt pressing.

| Sample            | Pressing temperature (°C) | before pressing |           | after pressing |           |
|-------------------|---------------------------|-----------------|-----------|----------------|-----------|
|                   |                           | $M_n$ (kDa)     | $\bar{D}$ | $M_n$ (kDa)    | $\bar{D}$ |
| P(tCL)            | 102                       | 63.7            | 1.68      | 62.4           | 1.71      |
| Low- $M_n$ P(tCL) | 102                       | 28.9            | 1.50      | 29.6           | 1.57      |

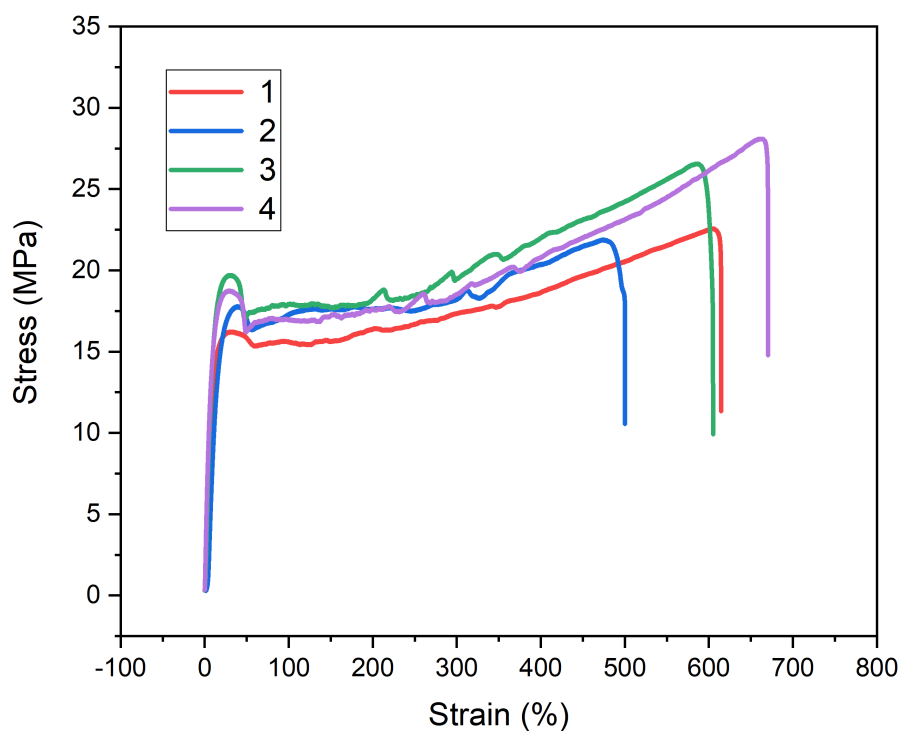

**Fig. S16** Stress-strain curves of P(tCL)s.

**Table S3** Summary of mechanical properties of P(tCL)s. <sup>[a]</sup>

| Entry   | $\sigma_Y$ (MPa) | $\sigma_B$ (MPa) | $E$ (MPa)          | Elongation (%)     |
|---------|------------------|------------------|--------------------|--------------------|
| 1       | 16.23            | 19.67            | 199.16             | 614.55             |
| 2       | 17.79            | 18.22            | 144.39             | 499.84             |
| 3       | 19.71            | 17.04            | 214.87             | 604.85             |
| 4       | 18.75            | 25.04            | 239.28             | 670.23             |
| Average | $18.12 \pm 1.48$ | $19.99 \pm 3.53$ | $199.43 \pm 40.23$ | $597.37 \pm 71.11$ |

[a] Condition: Tested by uniaxial tensile tests. Strain rate of 10 mm/min,  $\sigma_Y$ : yield strength,  $\sigma_B$ : break strength,  $E$ : Tensile modulus.

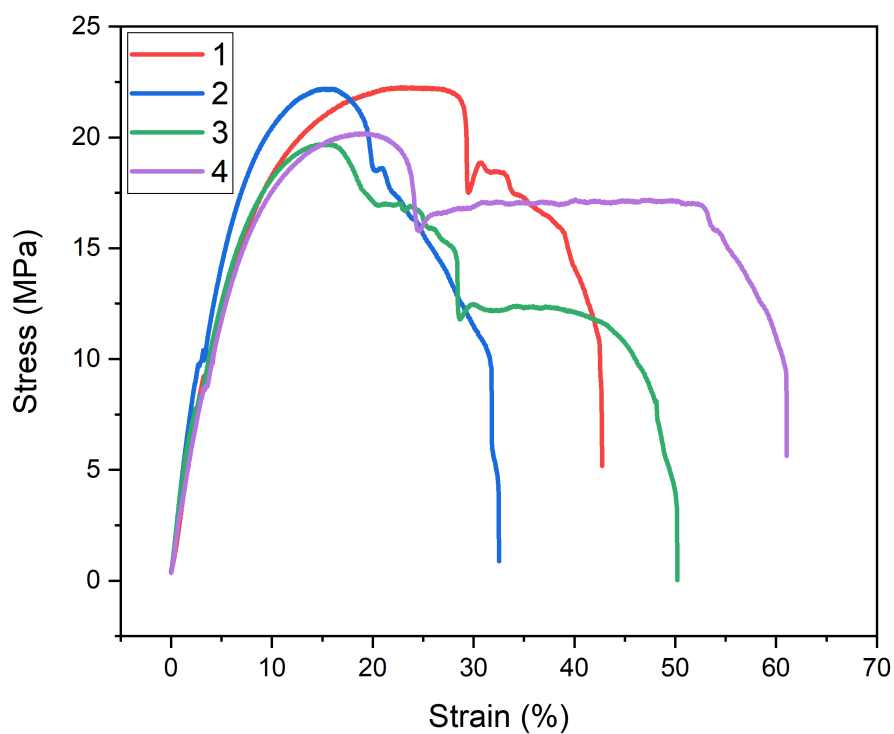

**Fig. S17** Stress-strain curves of Low- $M_n$  P(tCL) samples.

**Table S4** Summary of mechanical properties of Low- $M_n$  P(tCL). <sup>[a]</sup>

| Entry   | $\sigma_Y$ (MPa) | $\sigma_B$ (MPa) | E (MPa)            | Elongation (%)   |
|---------|------------------|------------------|--------------------|------------------|
| 1       | 20.19            | 9.44             | 308                | 61.0             |
| 2       | 22.26            | 8.50             | 296                | 42.7             |
| 3       | 22.19            | 9.57             | 411                | 36.5             |
| 4       | 19.71            | 8.49             | 402                | 51.2             |
| Average | $21.09 \pm 1.33$ | $9.00 \pm 0.59$  | $354.14 \pm 60.62$ | $47.8 \pm 10.65$ |

[a] Condition: Tested by uniaxial tensile tests. Strain rate of 10 mm/min,  $\sigma_Y$ : yield strength,  $\sigma_B$ : break strength, E: Tensile modulus.



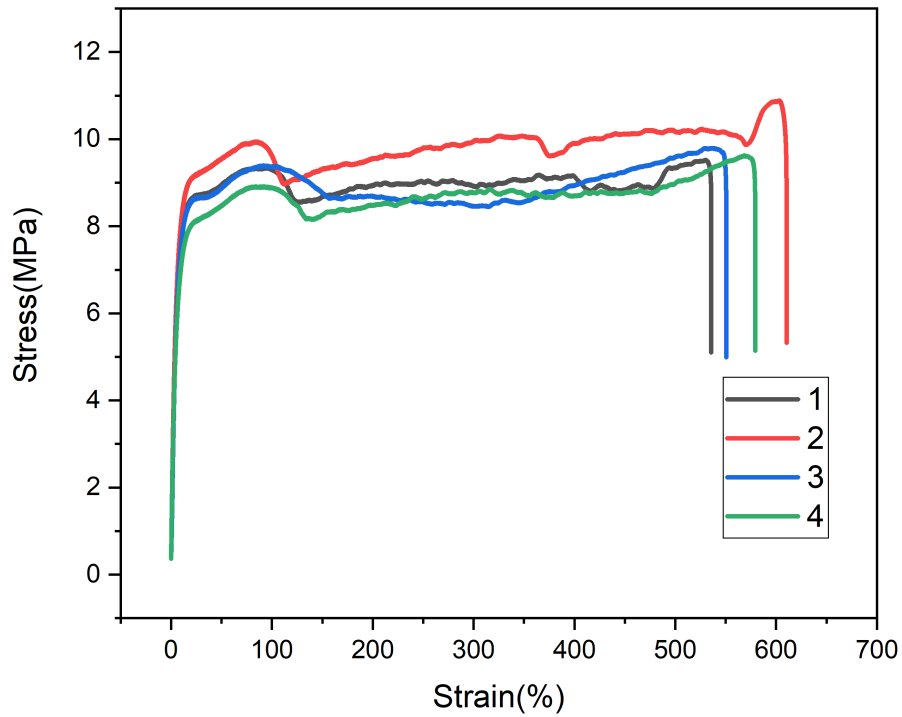

**Fig. S18** Stress-strain curves of LDPE.

**Table S5** Summary of mechanical properties of LDPE.<sup>[a]</sup>

| Entry   | $\sigma_Y$ (MPa) | $\sigma_B$ (MPa) | E (MPa)         | Elongation (%)  |
|---------|------------------|------------------|-----------------|-----------------|
| 1       | 9.35             | 8.67             | 169             | 536             |
| 2       | 9.95             | 9.03             | 171             | 610             |
| 3       | 9.39             | 8.49             | 134             | 551             |
| 4       | 8.91             | 8.66             | 174             | 579             |
| Average | $9.40 \pm 0.43$  | $8.71 \pm 0.23$  | $162 \pm 18.63$ | $569 \pm 32.99$ |

[a] Condition: Tested by uniaxial tensile tests. Strain rate of 10 mm/min,  $\sigma_Y$ : yield strength,  $\sigma_B$ : break strength, E: Tensile modulus.

## Transport Property

**Table S6** Oxygen permeability values of LDPE and P(tCL).

| Samples | Average thickness(mm) | Oxygen transmissibility<br>( $\text{cm}^3/\text{m}^2 \text{ d pa}$ ) | $P_{\text{O}_2}$ (Barrer) |
|---------|-----------------------|----------------------------------------------------------------------|---------------------------|
| LDPE    | 0.397                 | $2.87 \cdot 10^{-3}$                                                 | 1.76                      |
| P(tCL)  | 0.310                 | $77.87 \cdot 10^{-4}$                                                | 0.38                      |

**Table S7** Water vapor transmission rate of LDPE and P(tCL).

| Samples | Average thickness(mm) | WVT ( $\text{g}/\text{m}^2 \text{ day}$ ) | WVTR ( $\text{g mm m}^{-2} \text{ day}^{-1}$ ) |
|---------|-----------------------|-------------------------------------------|------------------------------------------------|
| LDPE    | 0.296                 | 0.814                                     | 0.24                                           |
| P(tCL)  | 0.309                 | 7.32                                      | 2.26                                           |

## The Hydrolytic Stability Study

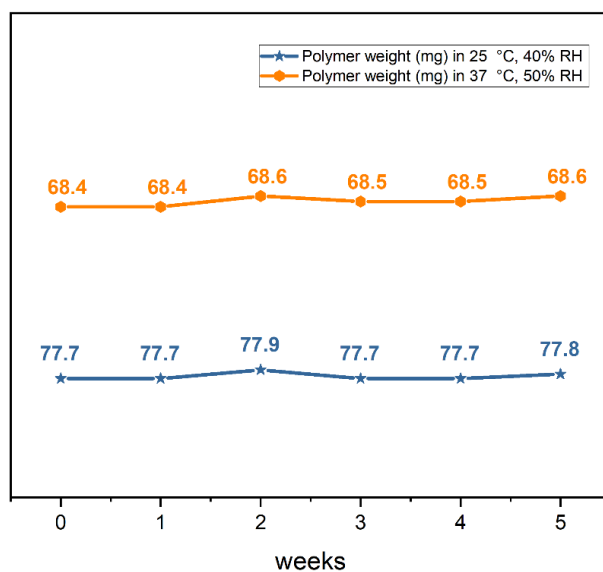

Fig. S19 The polymer weight change curves of P(tCL).

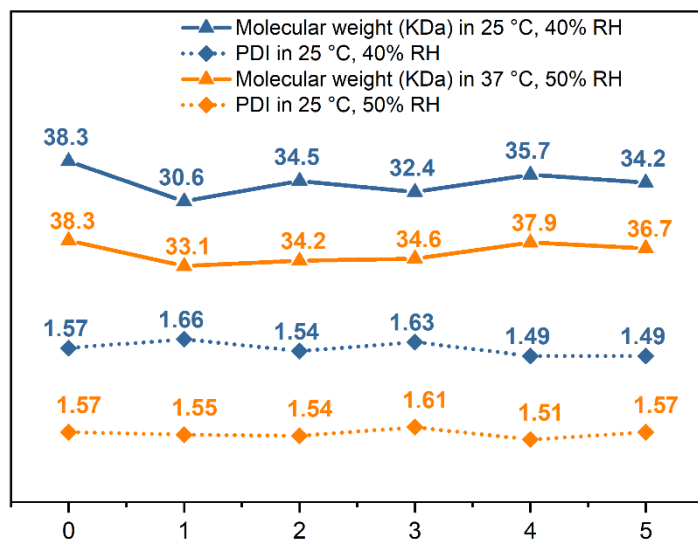

Fig. S20 The molecular weight and dispersity change curves of P(tCL).

## Thermodynamic Study

In an argon-filled glovebox, a DMSO- $d_6$  stock solution of monomer (0.5 mmol), TBD (0.01 mmol), and BnSH (0.01 mmol,  $[M]/[TBD]/[I] = 50/1/1$ ) was prepared in a 5 mL volumetric flask. The mixture was stirred for 10 min, and the resulting solution was divided into 4 NMR tubes, with each tube containing 0.35 mL reaction solution. These four tubes were placed in four pre-heated oil baths at different temperature. The above procedure was repeated twice so that three parallel samples were studied at each temperature. After the reaction reached the equilibrium, each polymerization for the thermodynamic studies was quenched with 0.25 mL DMSO- $d_6$  with benzoic acid (2 wt.%). The monomer concentration at the equilibrium was determined by  $^1\text{H}$  NMR spectroscopy.

**Table S8** Raw data over equilibrium conversion at various temperatures for tCL.

| Entry | T(K)   | Con. (%) | $[M]_0$ (mol/L) | $T^{-1}$ ( $\text{K}^{-1}$ ) | $[M]_{\text{eq}}$<br>mol/L | $\ln[M]_{\text{eq}}$ mol/L |
|-------|--------|----------|-----------------|------------------------------|----------------------------|----------------------------|
| 1     | 333.15 | 55.45    | 0.1             | 0.00300                      | 0.04455                    | -3.1111                    |
| 2     | 353.15 | 45.66    | 0.1             | 0.00283                      | 0.05434                    | -2.9125                    |
| 3     | 373.15 | 36.42    | 0.1             | 0.00268                      | 0.06358                    | -2.7555                    |
| 4     | 393.15 | 26.14    | 0.1             | 0.00254                      | 0.07386                    | -2.6056                    |

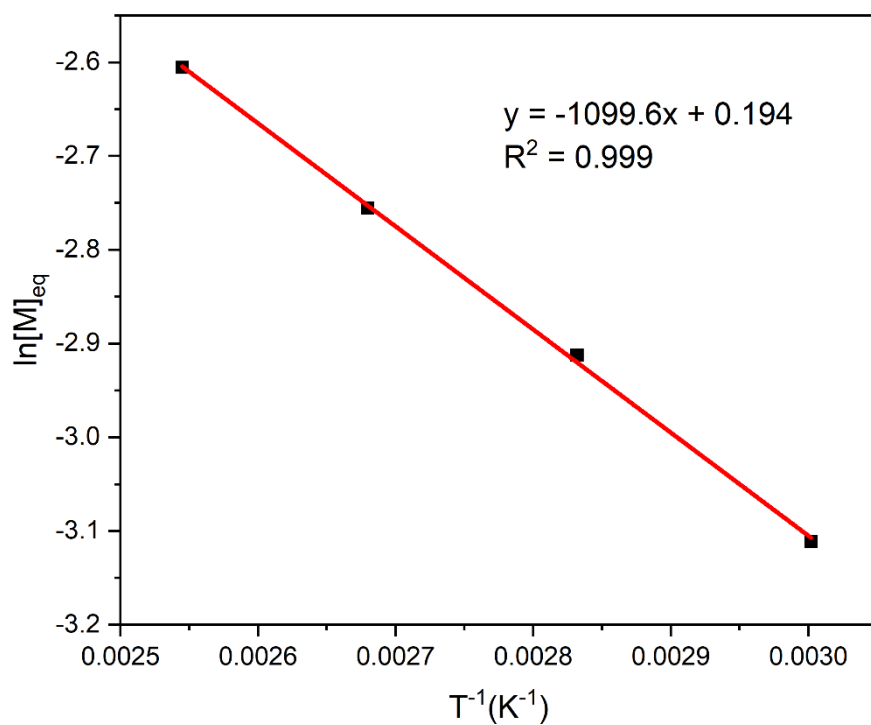

**Fig. S21** Van't Hoff plot of  $\ln[t\text{CL}]_{\text{eq}}$  vs. reciprocal of the absolute temperature ( $T^{-1}$ ).

The Van't Hoff plot of  $\ln[t\text{CL}]_{\text{eq}}$  versus  $T^{-1}$  gave a linear fitting with a slope of -1099.6 and an intercept of +0.194, from which the thermodynamic parameters were calculated to be  $\Delta H_p^\circ = -9.1 \text{ kJ mol}^{-1}$  and  $\Delta S_p^\circ = -1.61 \text{ J mol}^{-1} \text{ K}^{-1}$ , based on the equation  $\ln[t\text{CL}]_{\text{eq}} = \Delta H_p^\circ / RT - \Delta S_p^\circ / R$ , where R is the molar gas constant.  $T_c$  was calculated to be 5652 K (5379 °C) at  $[t\text{CL}]_0 = 1.0 \text{ mol/L}$ , based on the equation  $T_c = \Delta H_p^\circ / (\Delta S_p^\circ + R \ln [t\text{CL}]_0)$ .

## Chemical Recycling to Monomer (CRM)

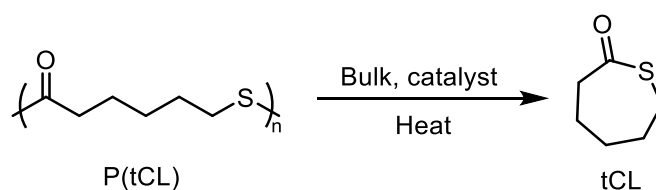

General procedures for the CRM of polymers under thermal bulk condition.

P(tCL):

Polymer P(tCL) and PEO-10000 were mixed in a weight ratio of 2:1, then the catalyst was added. The mixture was subjected to vacuum distillation at 180 °C. After the reaction was stopped, the sublimate was weighted and characterized by <sup>1</sup>H NMR spectroscopy.

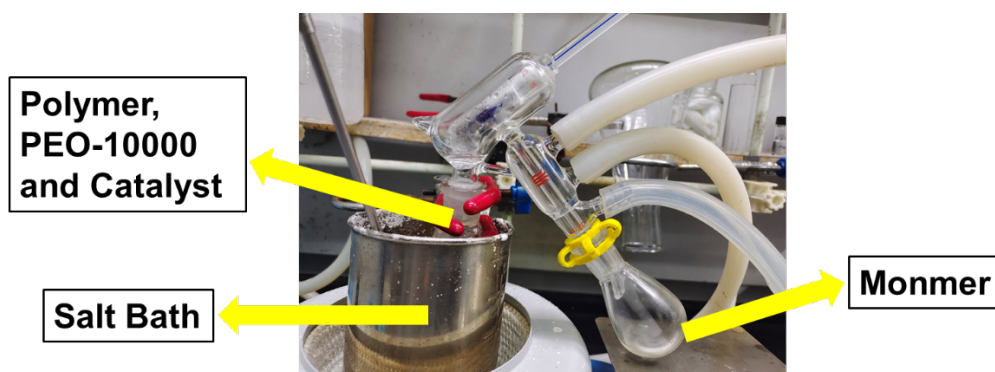

**Fig. S22** Thermal depolymerization of polymer to monomer via vacuum distillation.

**Table S9** Results of bulk thermal depolymerization of P(tCL).<sup>[a]</sup>

| Entry | Catalyst             | Catalyst loading(mol%) | Temperature(°C) | Time(h) | Monomer yield (%) <sup>[b]</sup> |
|-------|----------------------|------------------------|-----------------|---------|----------------------------------|
| 1     | Sn(Oct) <sub>2</sub> | 5                      | 120             | 5       | -                                |
| 2     | Sn(AcO) <sub>2</sub> | 5                      | 120             | 8       | -                                |
| 3     | PhSNa                | 5                      | 180             | 2       | 92                               |
| 4     | PhSNa                | 2                      | 180             | 5       | 33                               |

[a] Condition: The mass of polymer sample was 3 g,  $M_n(\text{PEO})=10000$ ,  $m_{\text{PEO}}:m_{\text{polymer}} = 2:1$ . [b] the monomer yield determined by the amount of the sublimate and the purity of recycled monomer determined by <sup>1</sup>H NMR spectroscopy.

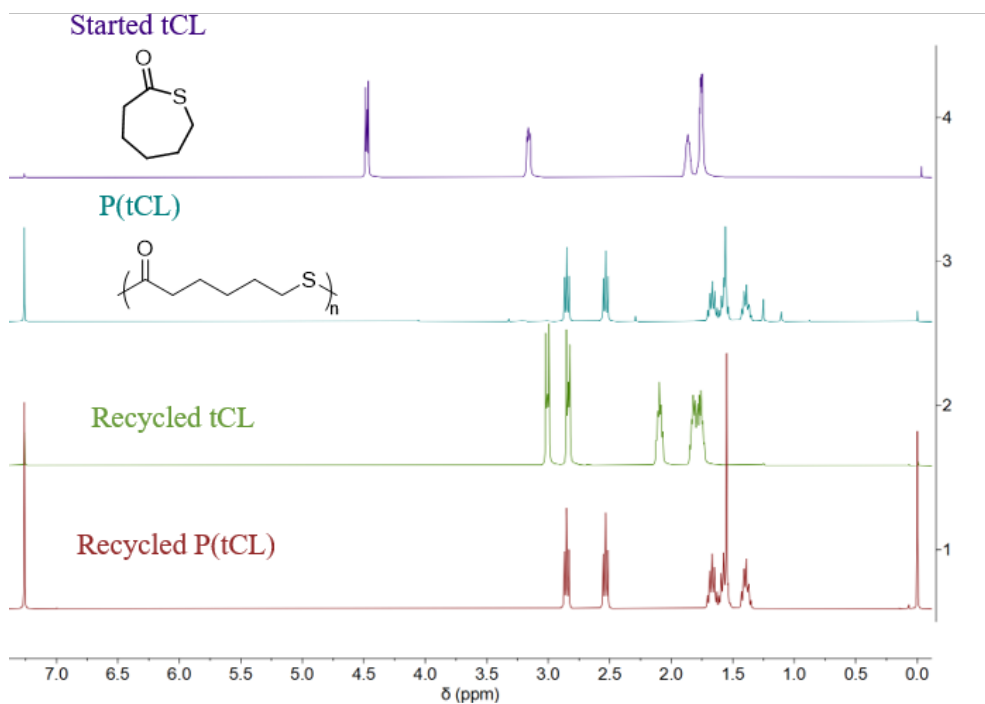

**Fig. S23**  $^1\text{H}$  NMR spectra of the recycled tCL by the thermal depolymerization of P(tCL).

a) Starting tCL for comparison; b) Recycled tCL by the thermal depolymerization; c) P(tCL) obtained by  $[\text{tCL}]/[\text{TBD}]/[\text{I}] = 100/1/1$ ; d) P(tCL) (repolymerization) obtained by  $[\text{recycled tCL}]/[\text{TBD}]/[\text{I}] = 100/1/1$ .

**Table S10** Results of repolymerization of recycled tCL.

| Entry | <b>M</b> | $[\text{M}]/[\text{Cat.}]/[\text{I}]$ | Time (min) | Conv. <sup>[a]</sup> (%) | $M_{n,\text{Calcd}}$ <sup>[b]</sup> (kDa) | $M_{n,\text{SEC}}$ <sup>[c]</sup> (kDa) | $\mathcal{D}$ <sup>[c]</sup> |
|-------|----------|---------------------------------------|------------|--------------------------|-------------------------------------------|-----------------------------------------|------------------------------|
| 1     | tCL      | 100:1:1                               | 10 min     | 85                       | 11.1                                      | 12.6                                    | 1.39                         |

[a] Monomer conversion measured by  $^1\text{H}$  NMR of the quenched solution. [b] Calculated from  $[\text{M}]_0/[\text{BnSH}]_0 \times \text{Conv.} \times \text{MW}_\text{M} + \text{MW}_\text{BnSH}$ . [c] Number-average molecular weight ( $M_n$ ) and dispersity index ( $\mathcal{D} = M_w/M_n$ ), determined by Size-Exclusion Chromatography (SEC) at 40 °C in THF.

## General procedure for the CRM of P(tCL) from a mixture of commodity plastics.

Commodity polymer samples obtained from various sources were mixed with P(tCL) (3.0 g) and loaded into a 50 mL round-bottom flask, then PEO-10000(14.0g) and 5% PhSNa (158 mg) were added. The flask was connected to a vacuum distillation equipment. The mixture was then placed in a hot salt bath and heated to 180–190 °C under vacuo for 3 hours. Clear distillate was collected, weighted (2.7 g, 90% yield), and characterized by <sup>1</sup>H NMR spectroscopy. The collected monomer was directly polymerized without further purification.

**Table S11** Composition of polymer mixture used in depolymerization study from mixed feedstocks.

| Component                      | Abbreviation | Source                     | Initial Mass (g) | Weight (%) |
|--------------------------------|--------------|----------------------------|------------------|------------|
| Poly(thiocaprolactone)         | P(tCL)       | Synthesized                | 3.0              | 42.9       |
| Polyethylene                   | HDPE         | Post-use bag               | 1.0              | 14.3       |
| Isotactic Polypropylene        | PP           | Post-use Box               | 1.0              | 14.3       |
| Polyethylene terephthalate     | PET          | Post-use Bottle            | 1.0              | 14.3       |
| Polystyrene                    | PS           | Post-use dental floss pick | 0.50             | 7.1        |
| Acrylonitrile-butadiene rubber | NBR          | Post-use gloves            | 0.50             | 7.1        |



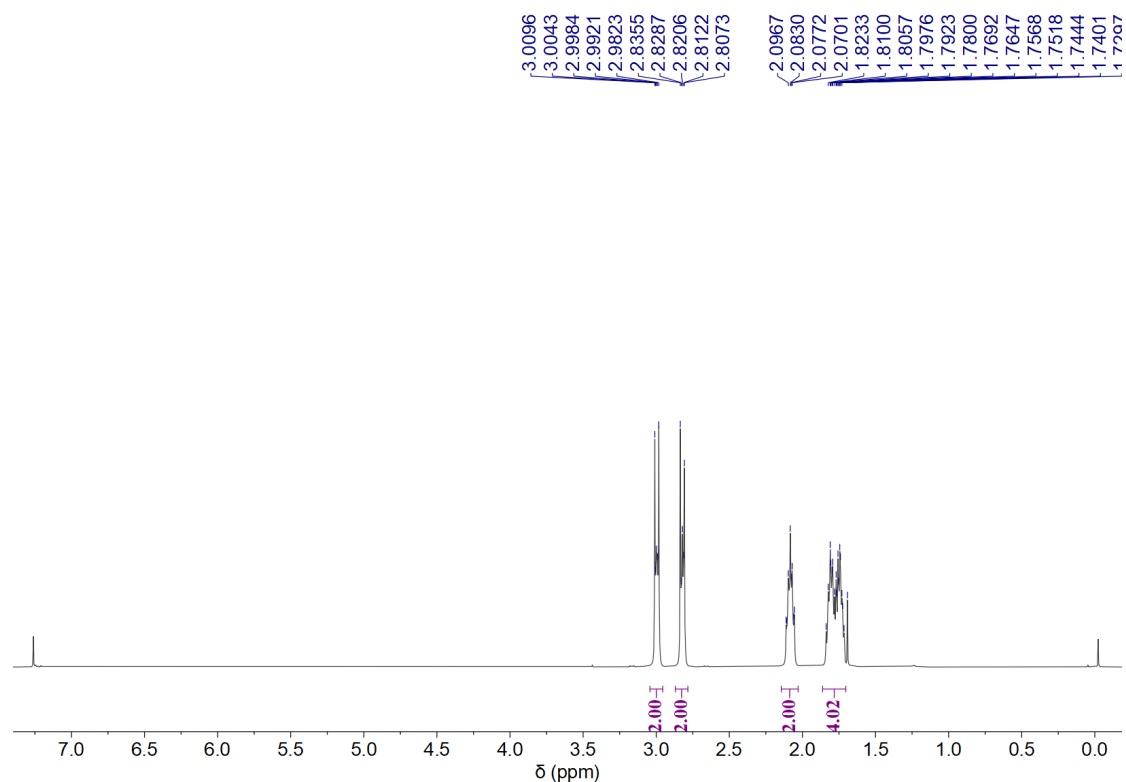

**Fig. S24**  $^1\text{H}$  NMR ( $\text{CDCl}_3$ , 25  $^\circ\text{C}$ ) spectrum of recycled tCL after depolymerization.

**Table S12** Results of repolymerization recycled tCL.

| Entry | <b>M</b> | $[\text{M}]/[\text{Cat.}]/[\text{I}]$ | Time<br>(min) | Conv. <sup>[a]</sup><br>(%) | $M_{n,\text{Calcd}}$ <sup>[b]</sup><br>(kDa) | $M_{n,\text{SEC}}$ <sup>[c]</sup><br>(kDa) | $\mathcal{D}$ <sup>[c]</sup> |
|-------|----------|---------------------------------------|---------------|-----------------------------|----------------------------------------------|--------------------------------------------|------------------------------|
| 1     | tCL      | 100:1:1                               | 12 min        | >99                         | 12.9                                         | 11.8                                       | 1.33                         |

[a] Monomer conversion measured by  $^1\text{H}$  NMR of the quenched solution. [b] Calculated from  $[\text{M}]_0/[\text{BnSH}]_0 \times \text{Conv.} \times \text{MW}_\text{M} + \text{MW}_\text{BnSH}$ . [c] Number-average molecular weight ( $M_n$ ) and dispersity index ( $\mathcal{D} = M_w/M_n$ ), determined by Size-Exclusion Chromatography (SEC) at 40  $^\circ\text{C}$  in THF.

## Reference

[1] *J. Am. Chem. Soc.* **1990**, *112*, 6263-6276.
